# Supplementary material
Source: Springer Nature journal article supplement (https://www.springermedizin.de/resource/supplementary/13054_2010_8855_MOESM3_ESM.pdf/9732766)

# Proportion of perfused vessels

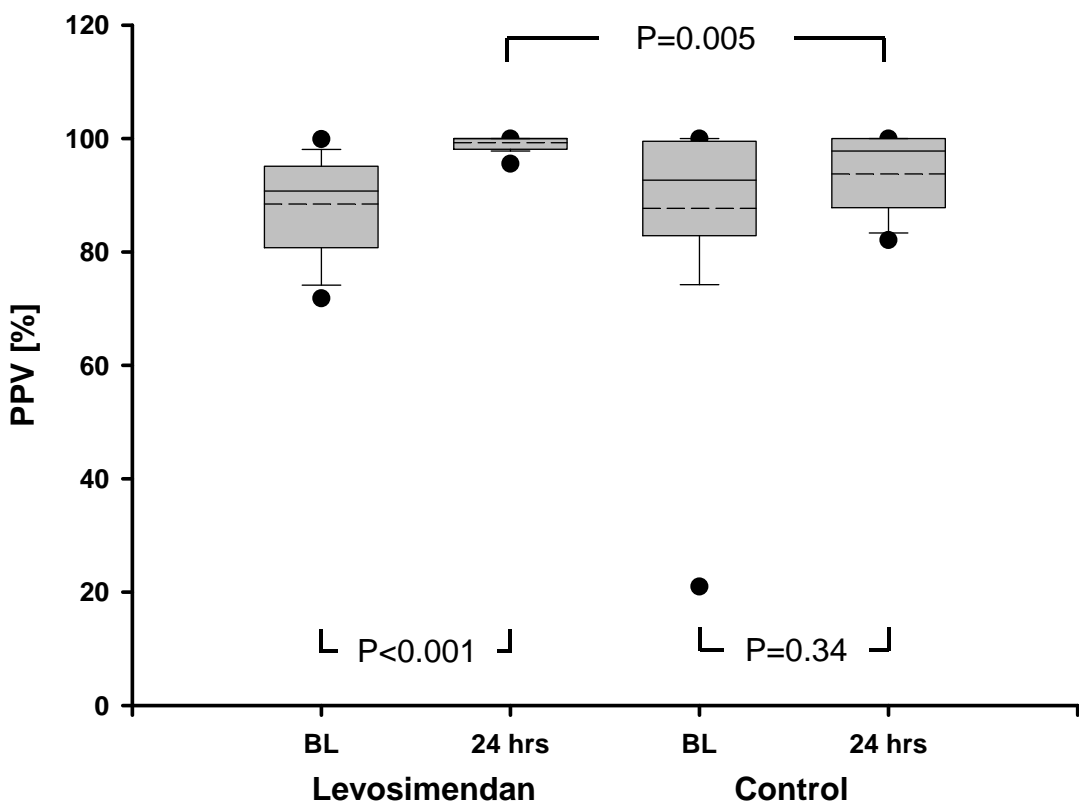

# Relative changes in proportion of perfused vessels

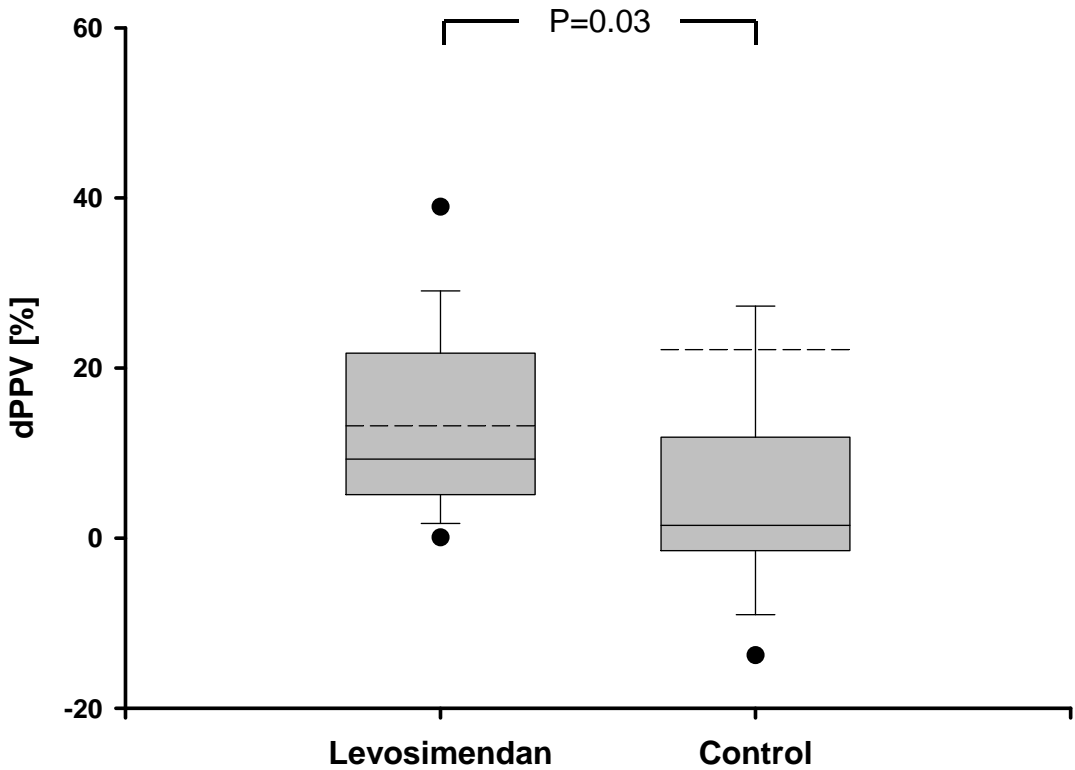

Supplement: MOESM3 [file 9732766]
